# Supplementary material for: Consequences of rewetting and ditch cleaning on hydrology, water quality and greenhouse gas balance in a drained northern landscape
Source: PubMed Central journal article supplement (PMC10657473; doi:10.1038/s41598-023-47528-4), 2023-11-18
Supplement: 41598_2023_47528_MOESM1_ESM.pdf [file 41598_2023_47528_MOESM1_ESM.pdf]

## 7 Supplementary

Table S 1. Catchment characteristics of the Trollberget Experimental Area (TEA). DC1-DC4 are the ditch cleaned experimental sites, where DC1 and DC3 were ditch cleaned and DC2 and DC4 were left alone. R1 and R2 are the hydrological restoration experimental sites.

| Catchment | Area<br>(ha) | Peat<br>(%) | Till<br>(%) | Rock outcrops<br>(%) | Type of<br>management | Ditch<br>length<br>(m) | Ditch density<br>(m ha <sup>-1</sup> ) | Length of ditches<br>managed<br>(m) | % of ditches<br>managed<br>(%) |
|-----------|--------------|-------------|-------------|----------------------|-----------------------|------------------------|----------------------------------------|-------------------------------------|--------------------------------|
| DC1       | 6.7          | 0           | 100         | 0                    | Ditch cleaning        | 849                    | 126                                    | 658                                 | 78                             |
| DC2       | 4.4          | 0           | 100         | 0                    | Left alone            | 1117                   | 252                                    | 0                                   | 0                              |
| DC3       | 8.4          | 0           | 100         | 0                    | Ditch cleaning        | 1780                   | 212                                    | 1077                                | 60                             |
| DC4       | 10.7         | 34          | 63          | 2                    | Left alone            | 795                    | 72                                     | 0                                   | 0                              |
| R1        | 47           | 30          | 43          | 27                   | Restoration           | 1986                   | 42                                     | 677                                 | 34                             |
| R2        | 60           | 23          | 56          | 22                   | Restoration           | 5189                   | 86                                     | 824                                 | 16                             |
